# Supplementary material
Source: publisher figshare collection journal article supplement (https://acs.figshare.com/ndownloader/files/4770487)
Supplement: Supplementary file 1 [file 4770487]

## Practical $\beta$ -Lactone Synthesis: Epoxide Carbonylation at 1 atm

John W. Kramer, Emil B. Lobkovsky, Geoffrey W. Coates\*

### General Procedure for Determination of Lactone Purity:

The purity of lactone products was measured on an HP 6890 Series GC equipped with an HP 19091J-413 phenylmethyl silicone column (0.32 mm  $\times$  30 m) using helium as the carrier gas. Upon injection at 55 °C, the temperature was held constant for 8 minutes. If necessary, the oven temperature was increased in the following increments: 30 °C/min to 100 °C and held for 7 minutes, then 30 °C/min to 130 °C and held for 5 minutes, and finally 30 °C/min to 150 °C and held for 5 minutes.

epichlorohydrin to lactone in DME at 100 psi CO

=====

Acq. Method : TLC\_IR2.M  
Method Profile:

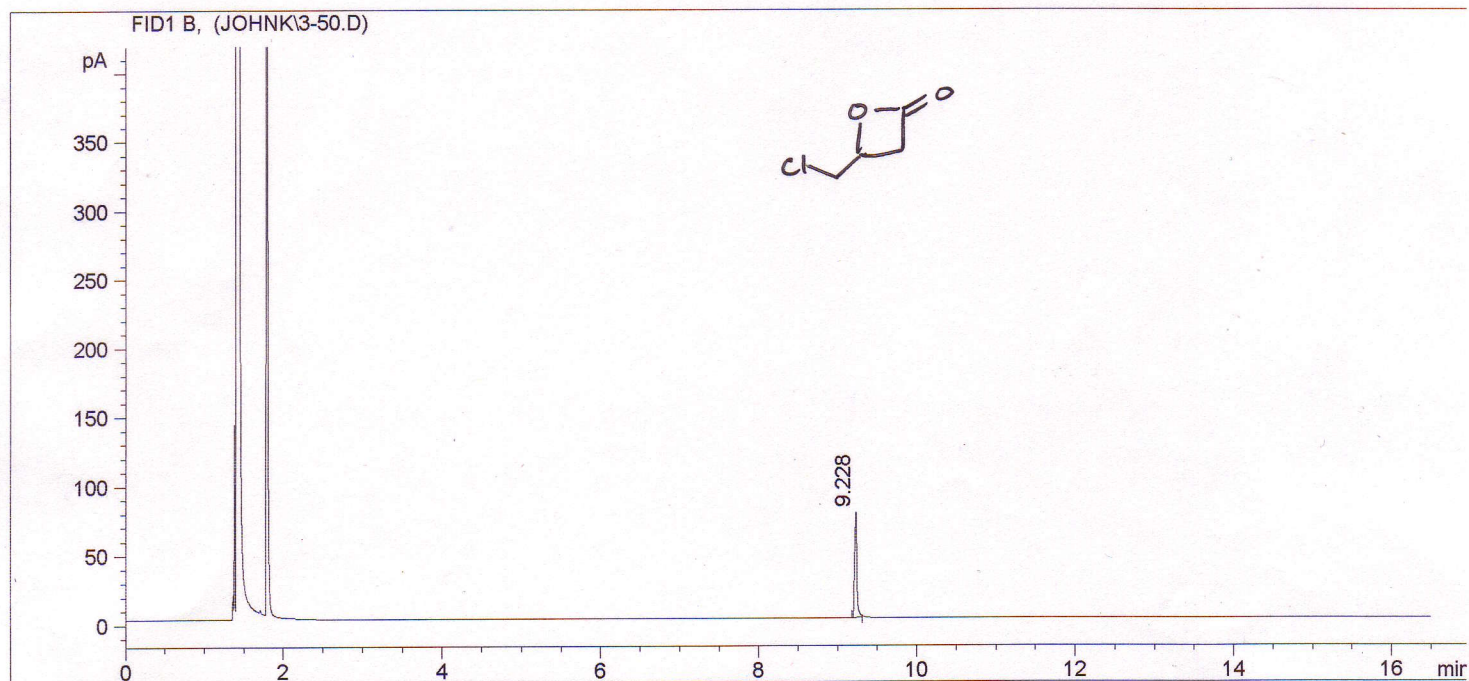

Signal 1:FID1 B,

| Peak # | RT [min] | Type | Width [min] | Area [pA*s] | Area % | Name |
|--------|----------|------|-------------|-------------|--------|------|
| 1      | 9.228    | PB   | 0.0349      | 155.095     | 100.00 |      |



trans 2-butene oxide to lactone in DME at 100 psi CO

=====

Acq. Method : TLC\_IR2.M  
Method Profile:

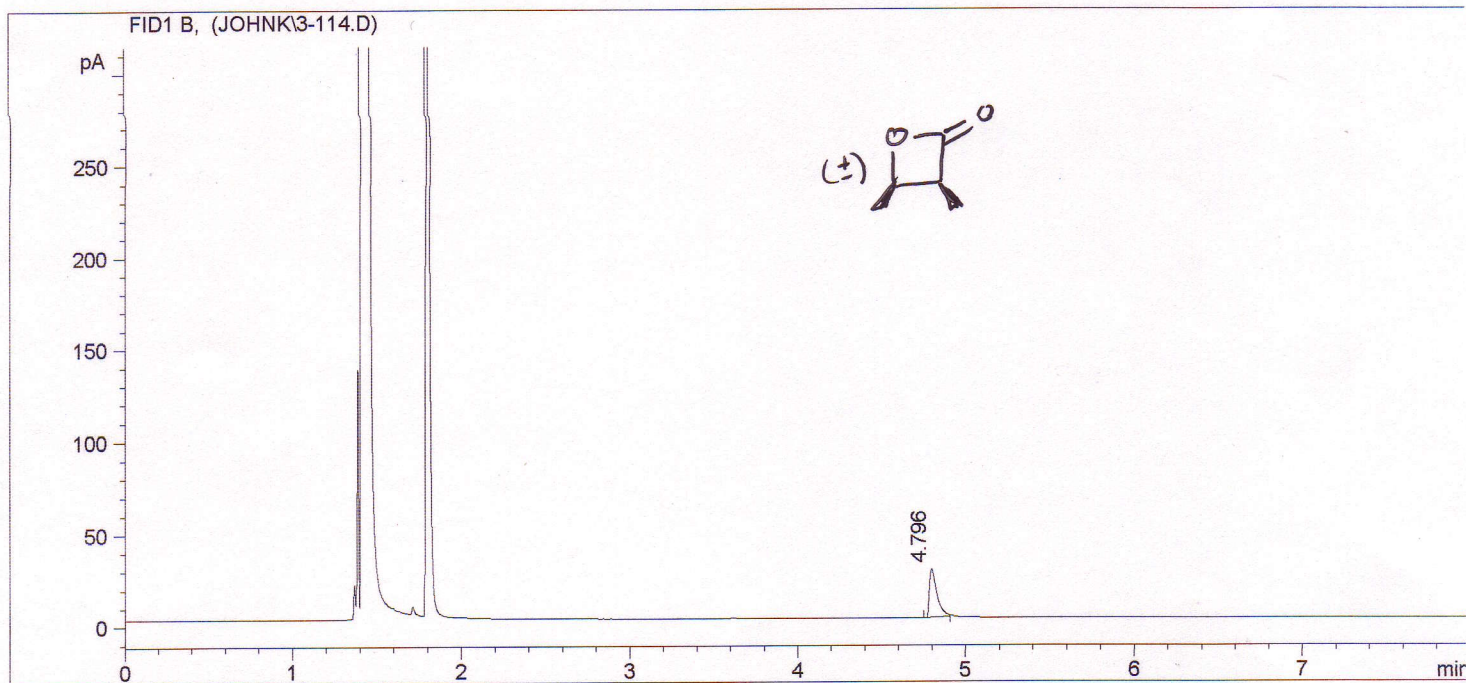

Signal 1:FID1 B,

| Peak # | RT [min] | Type | Width [min] | Area [pA*s] | Area % | Name |
|--------|----------|------|-------------|-------------|--------|------|
| 1      | 4.796    | PB   | 0.0462      | 80.839      | 100.00 |      |
